# Supplementary material
Source: publisher figshare collection journal article supplement (https://frontiersin.figshare.com/ndownloader/files/22737950)
Supplement: Supplementary file [file 22737950]

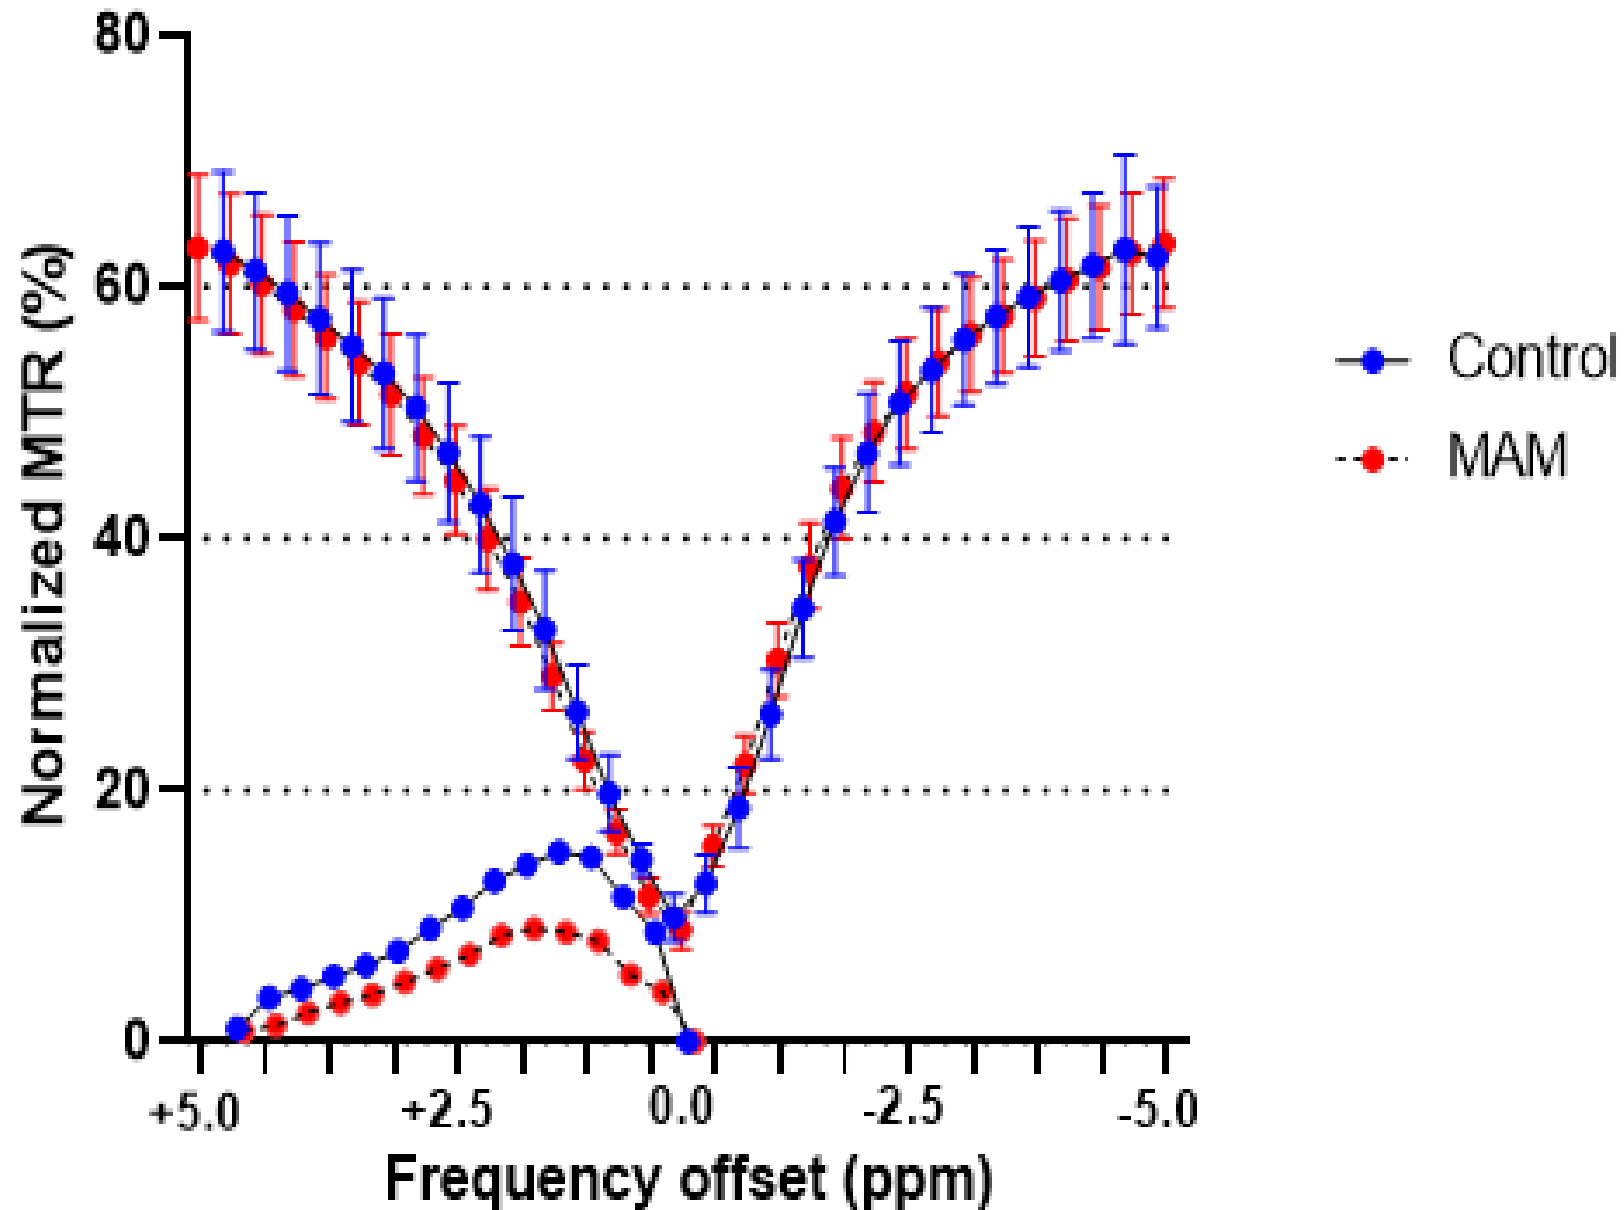

**Supplementary figure 1.** The experimentally acquired Z-spectral (Z+1400 to −1400 Hz) signal intensity from retrosplenial cortex of MAM-exposed rats and controls are shown. MTRasym (%) curves of each rats are shown at the bottom left.

$$\text{MTRasym} = [\text{Msat}(-\Delta\omega) - \text{Msat}(+\Delta\omega)]/M_0.$$

"Msat ( $\pm \Delta\omega$ ) are the magnetizations obtained with saturation  $\Delta\omega$  offset from the water resonance and  $M_0$  is the magnetization without saturation."
